# Supplementary material for: RubyACRs, non-algal anion channelrhodopsins with highly red-shifted absorption
Source: bioRxiv or medRxiv preprint supplement (doi:10.1101/2020.04.15.043158), 2020-04-16
Supplement: Supplementary file [file media-1.pdf]

Supplementary Information for

**RubyACRs, non-algal anion channelrhodopsins with highly red-shifted absorption**

Elena G. Govorunova<sup>1</sup>, Oleg A. Sineshchekov<sup>1</sup>, Hai Li<sup>1</sup>, Yumei Wang<sup>1</sup>, Leonid S. Brown<sup>2</sup> and John L. Spudich<sup>1\*</sup>

<sup>1</sup>Center for Membrane Biology, Department of Biochemistry & Molecular Biology, The University of Texas Health Science Center at Houston, McGovern Medical School, Houston, Texas, USA;  
<sup>2</sup>Department of Physics and Biophysics Interdepartmental Group, University of Guelph, Guelph, Ontario, Canada.

\* Address correspondence to: John L. Spudich.

**Email: [John.L.Spudich@uth.tmc.edu](mailto:John.L.Spudich@uth.tmc.edu)**

**This PDF file includes:**

Figures S1 to S6

Tables S1 to S2

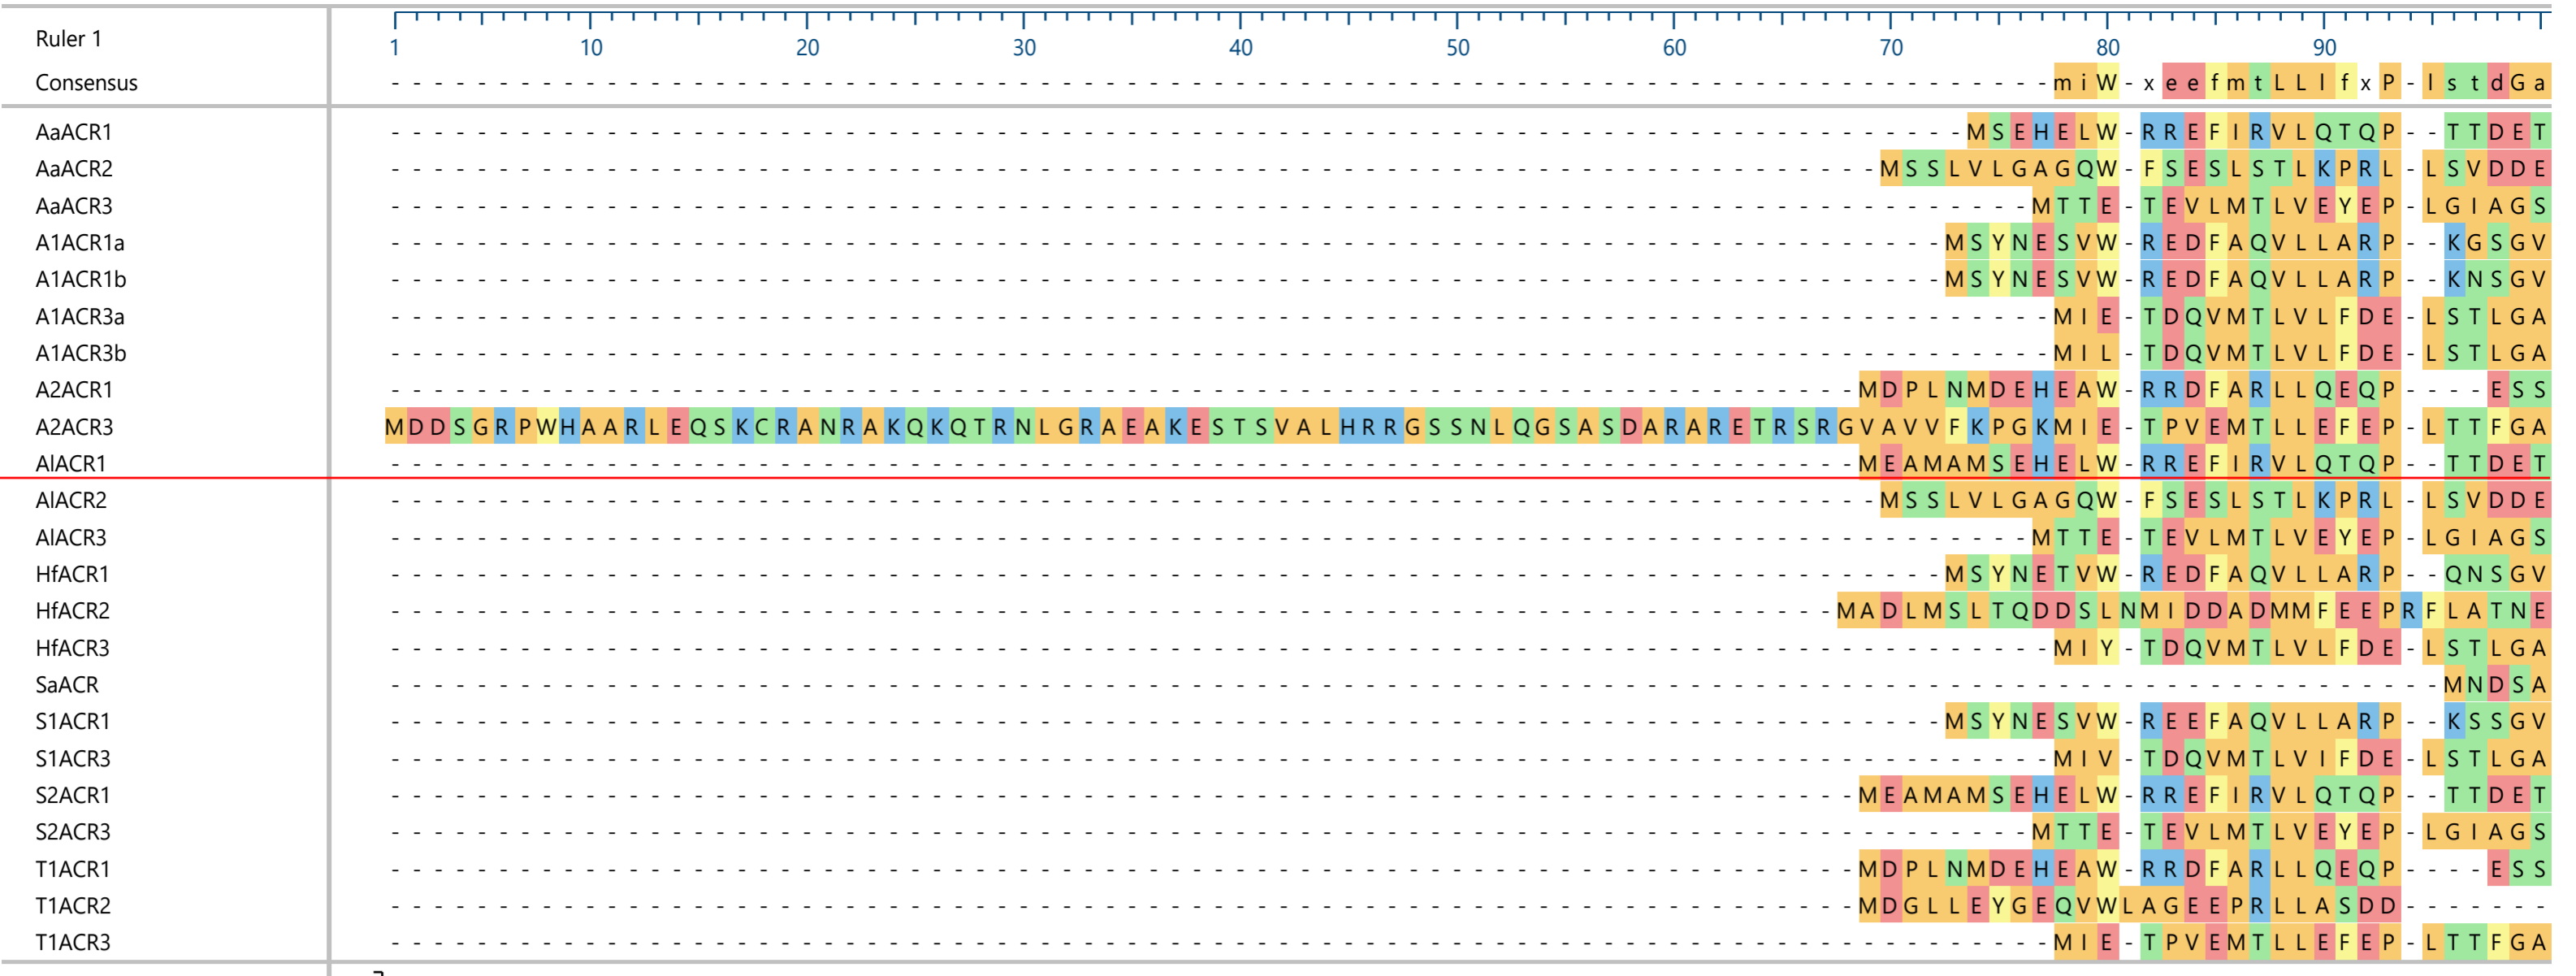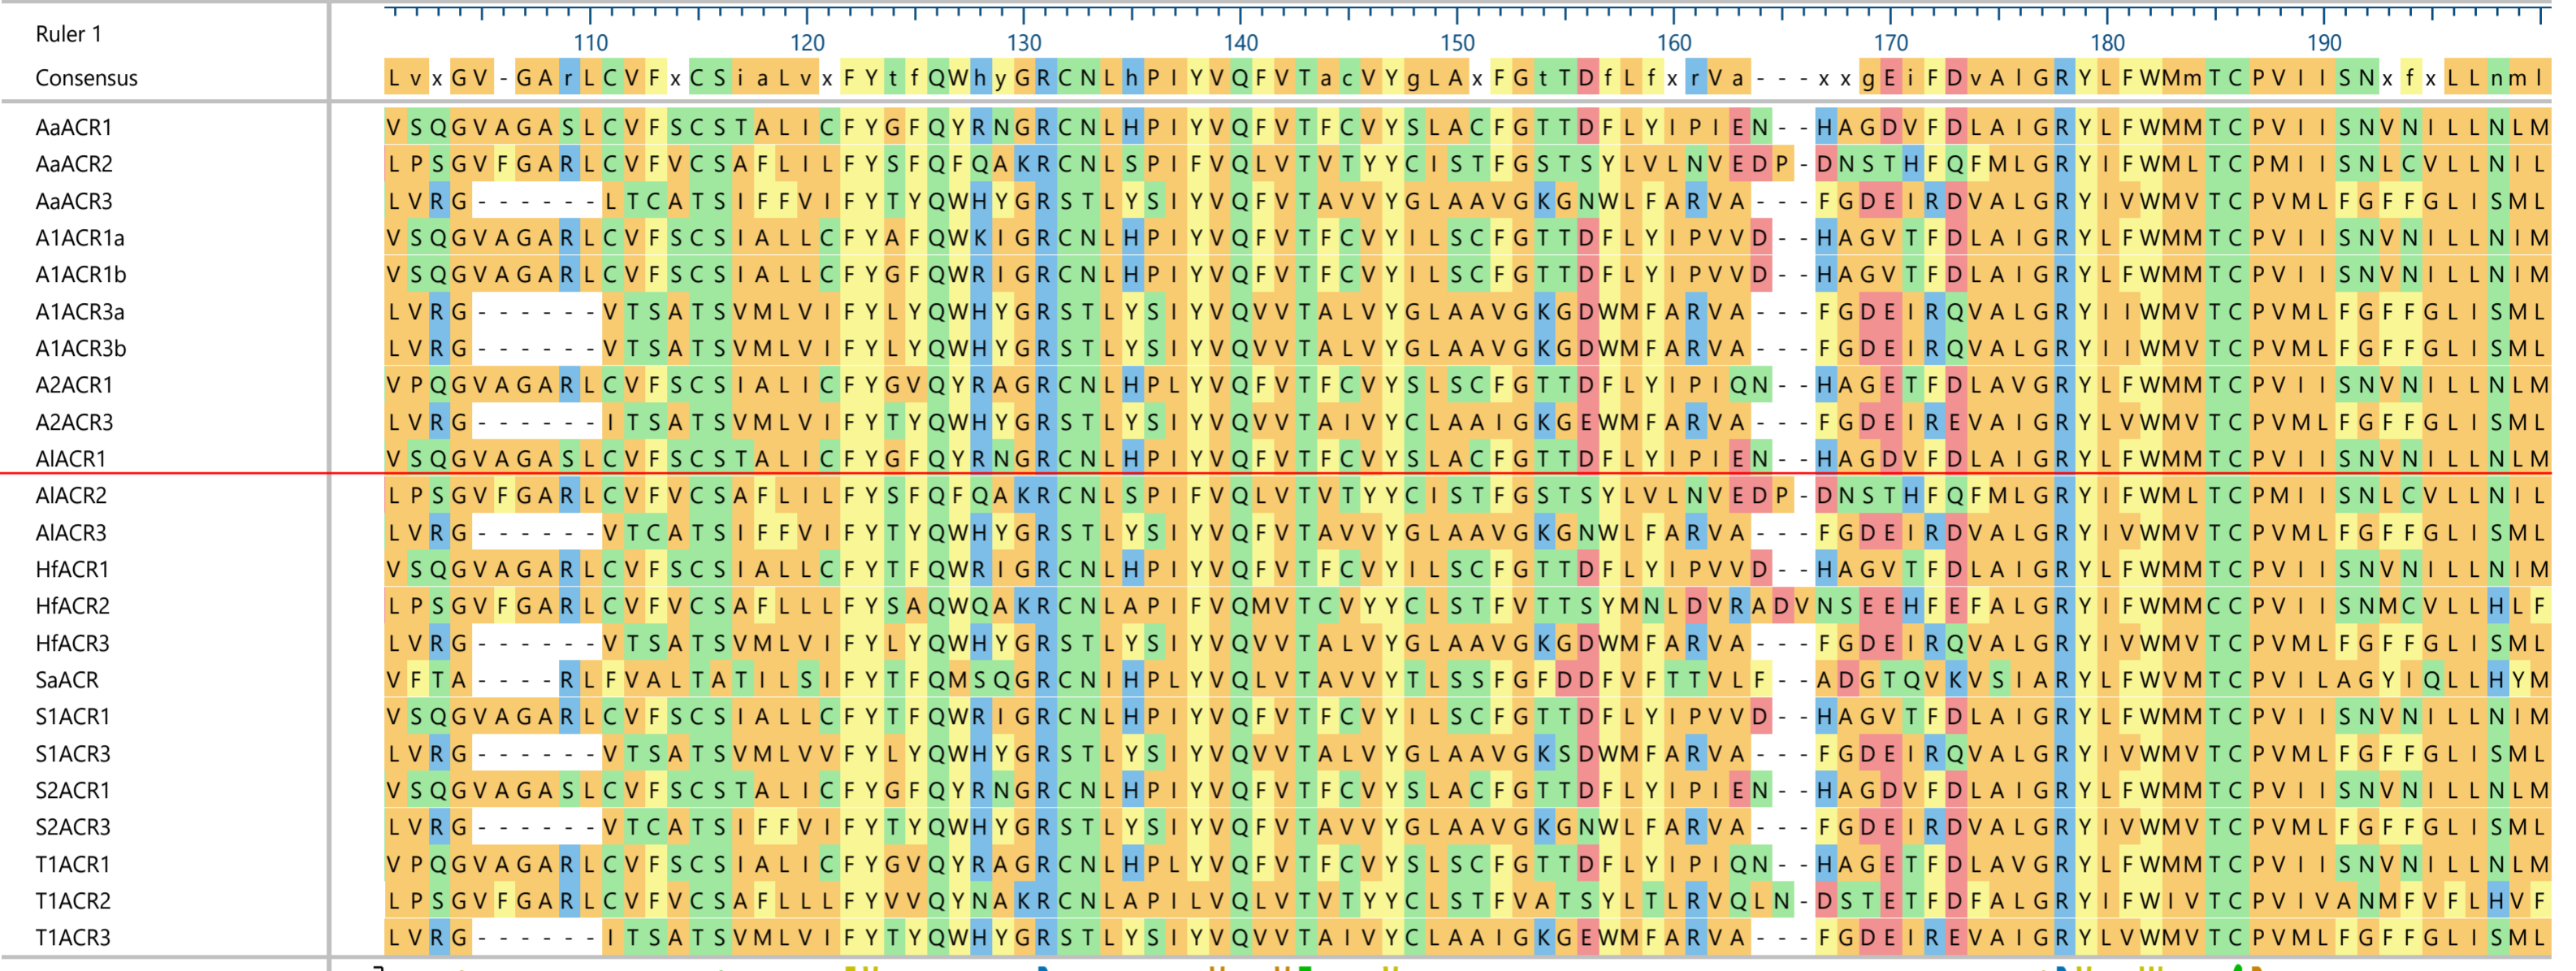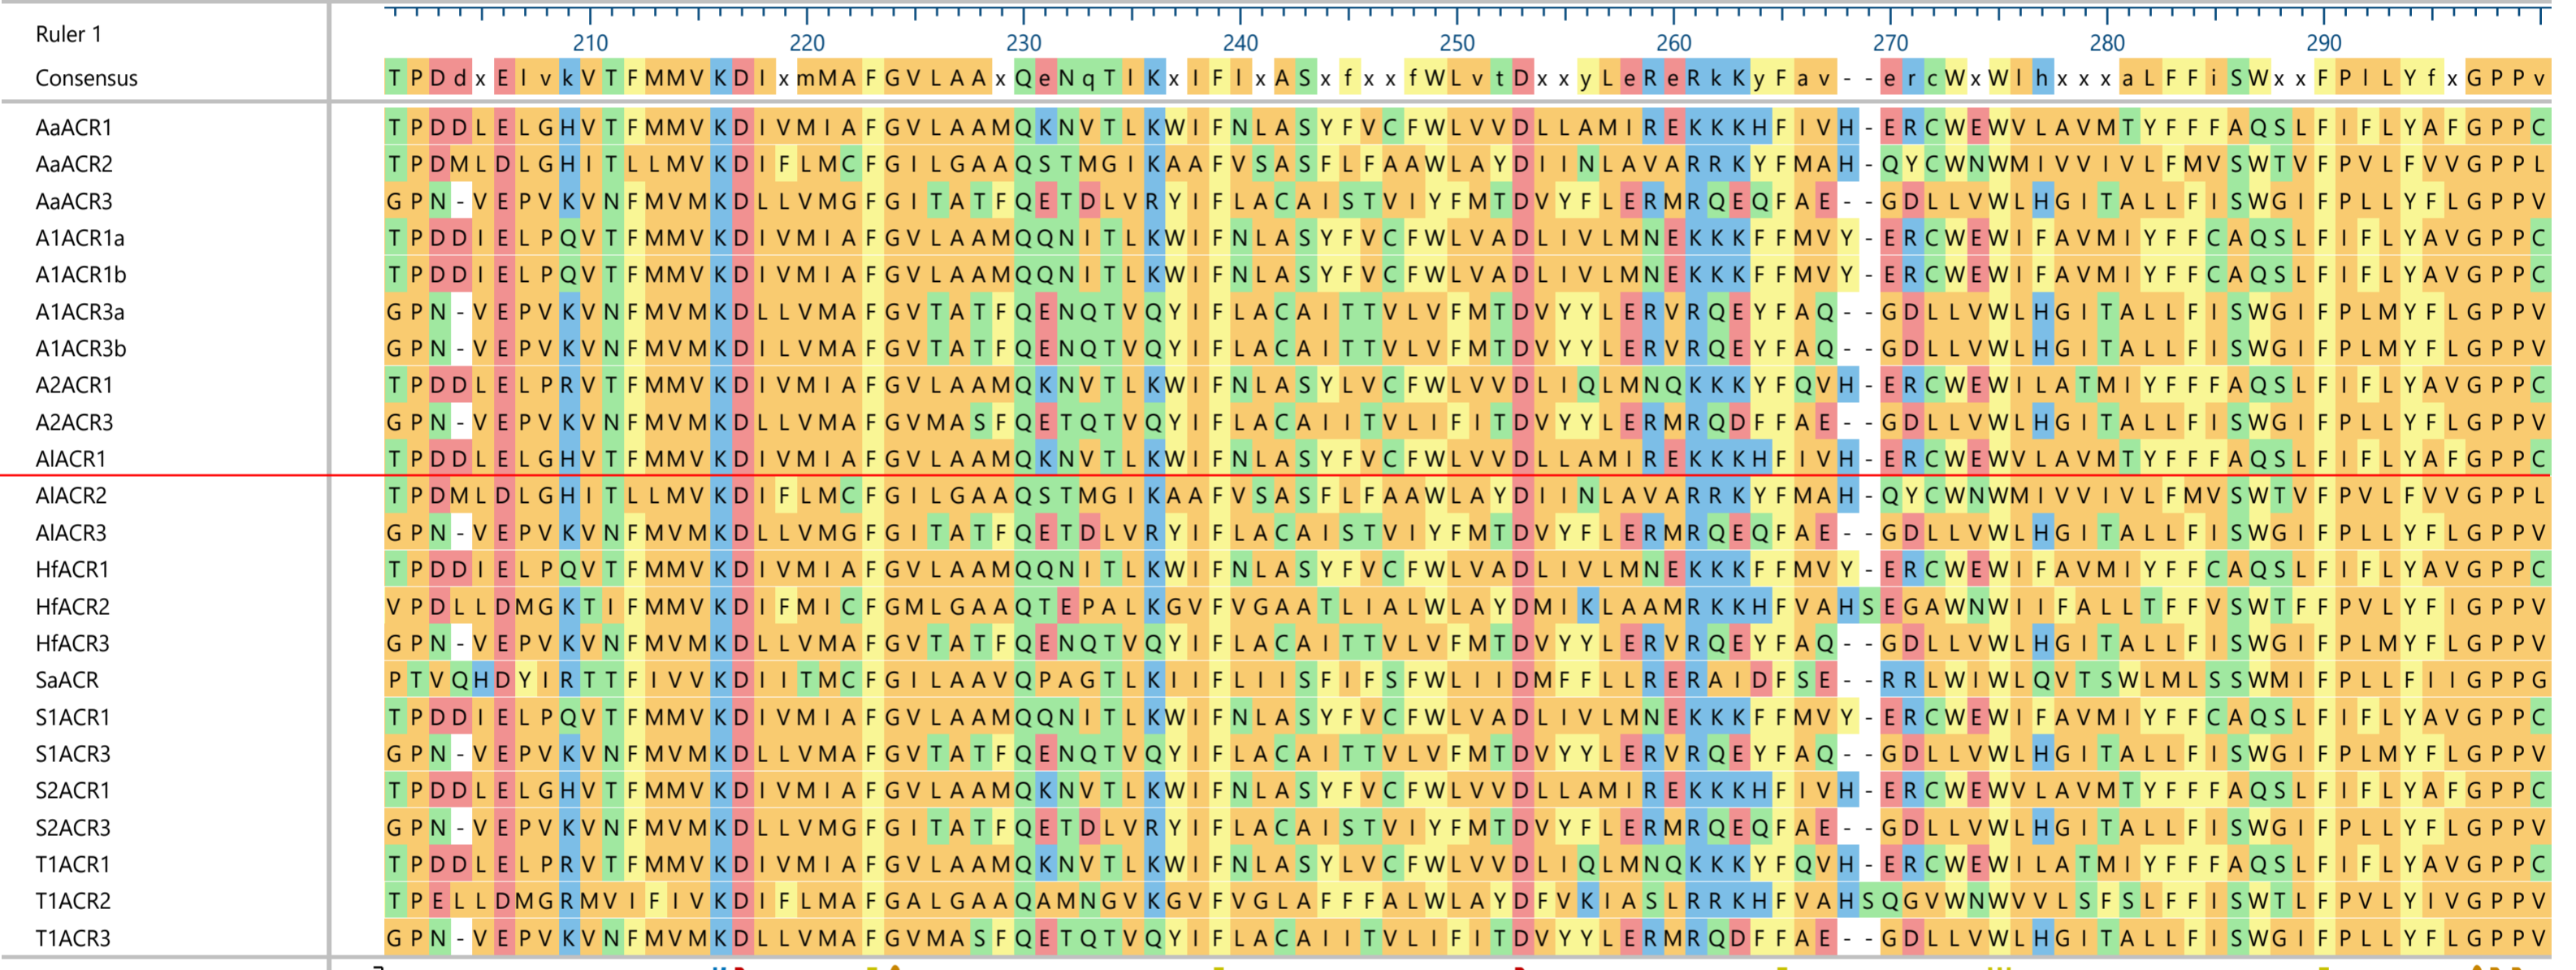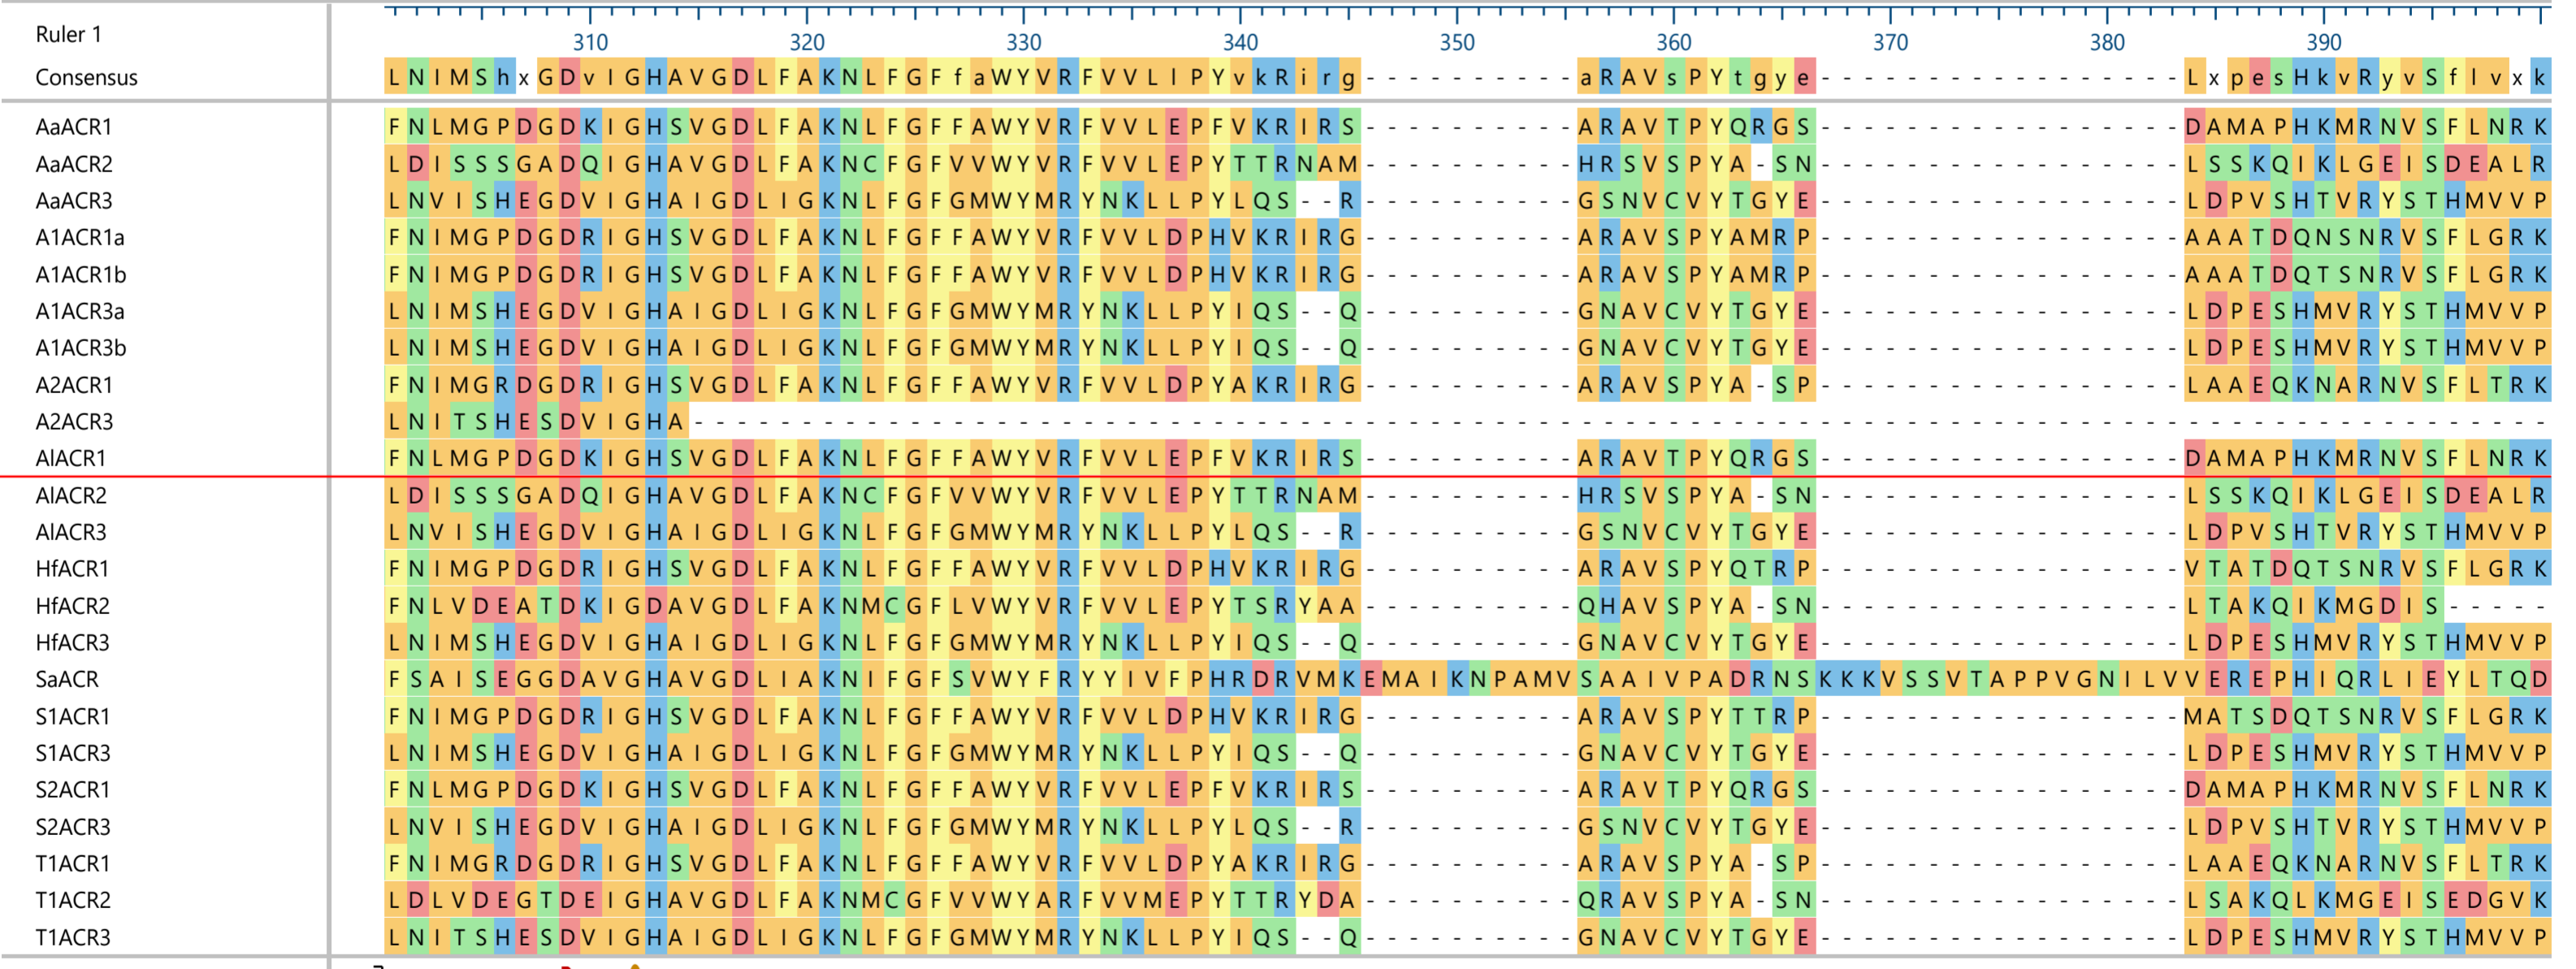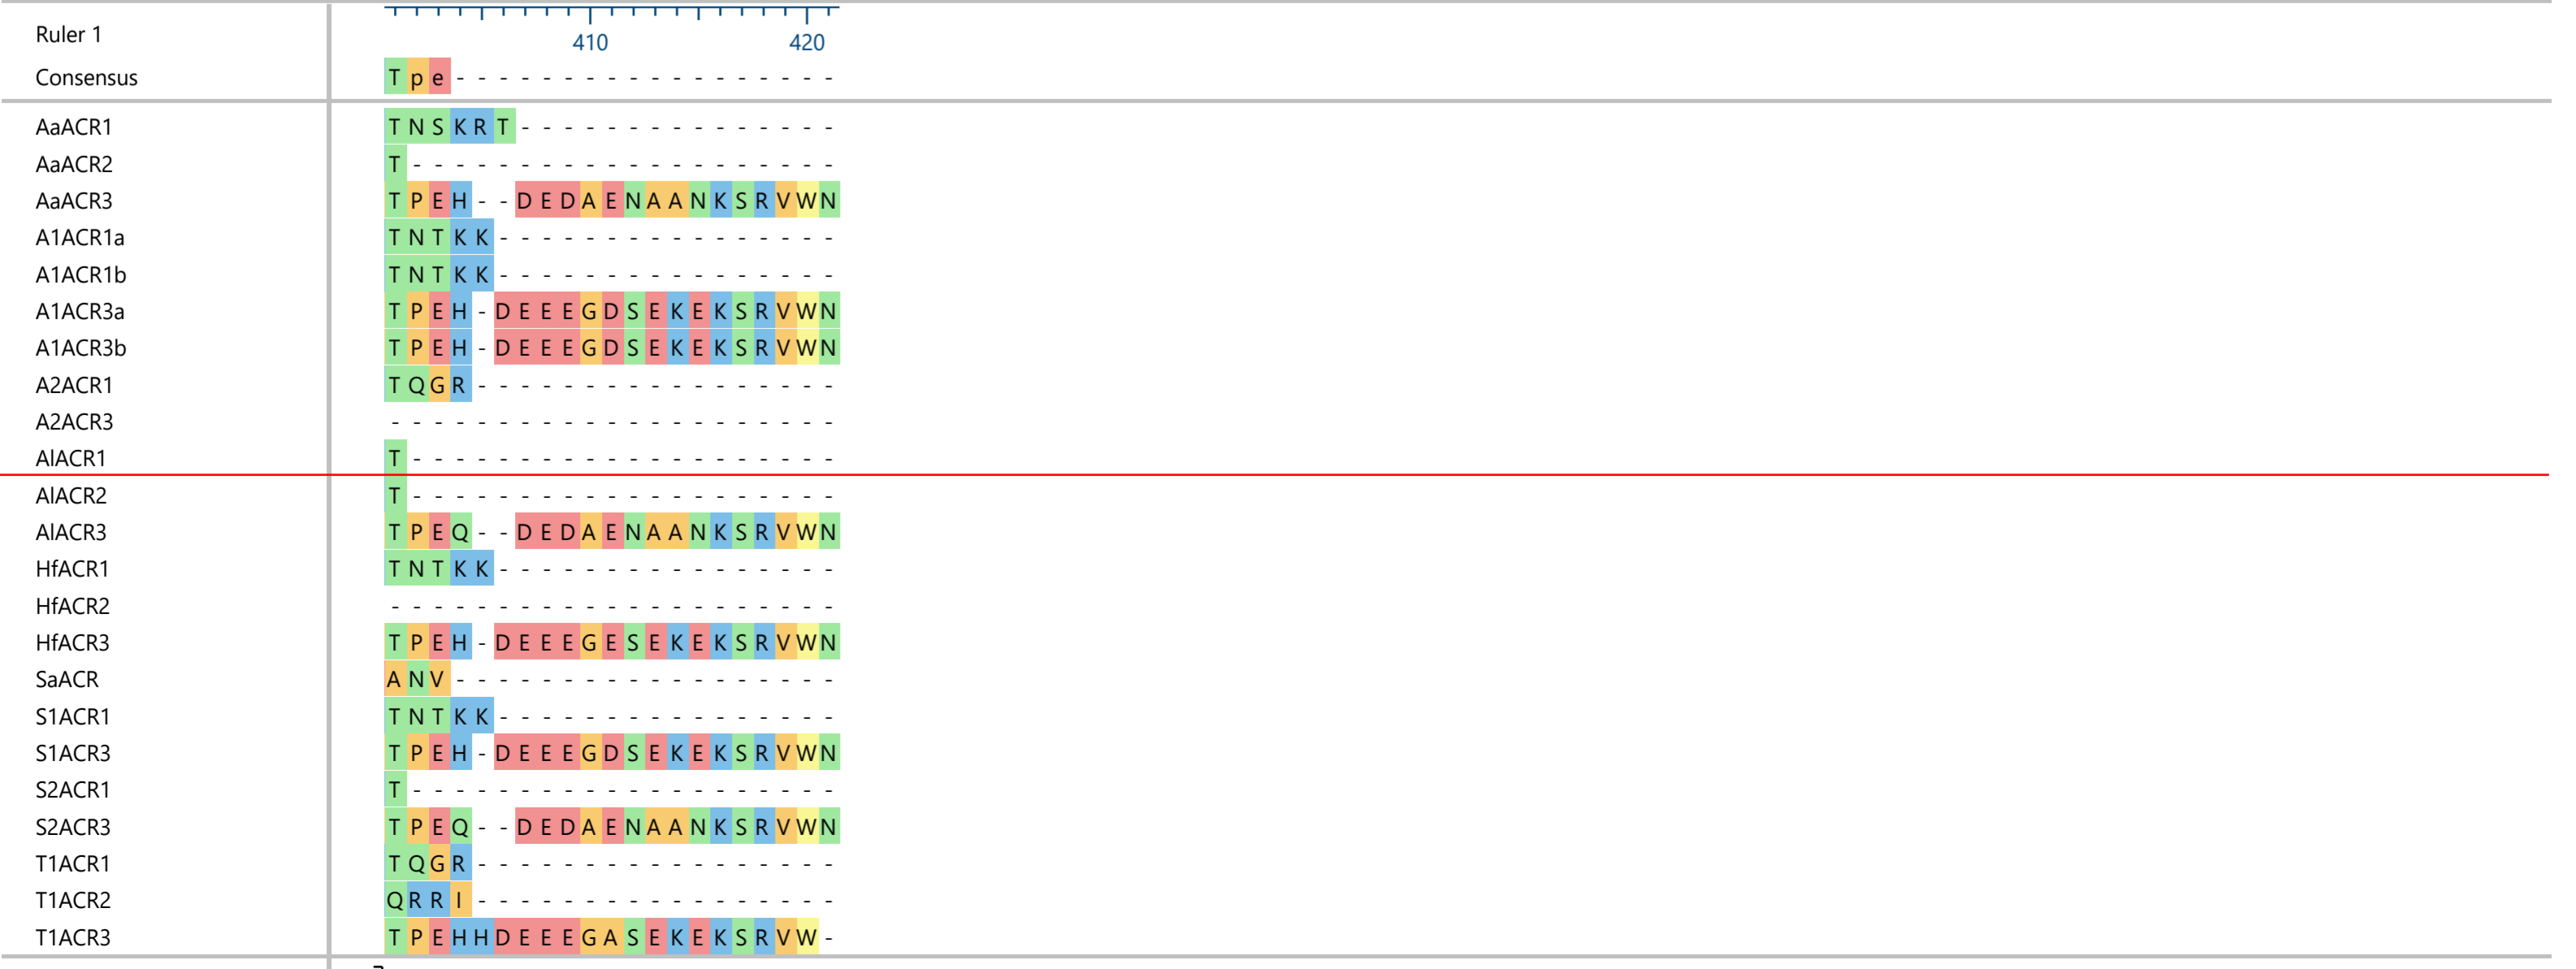

**Fig. S1.** Protein sequence alignment of the rhodopsin domains of Laby channelrhodopsins. Residues are color-coded according to their chemical properties. The arrows point to the positions of the residues known to be functionally important in *GtACR1*.



**Fig. S2.** Protein sequence alignment of the rhodopsin domains of Hapto channelrhodopsins. Residues are color-coded according to their chemical properties. The arrows point to the positions of the residues known to be functionally important in *Gt*ACR1.

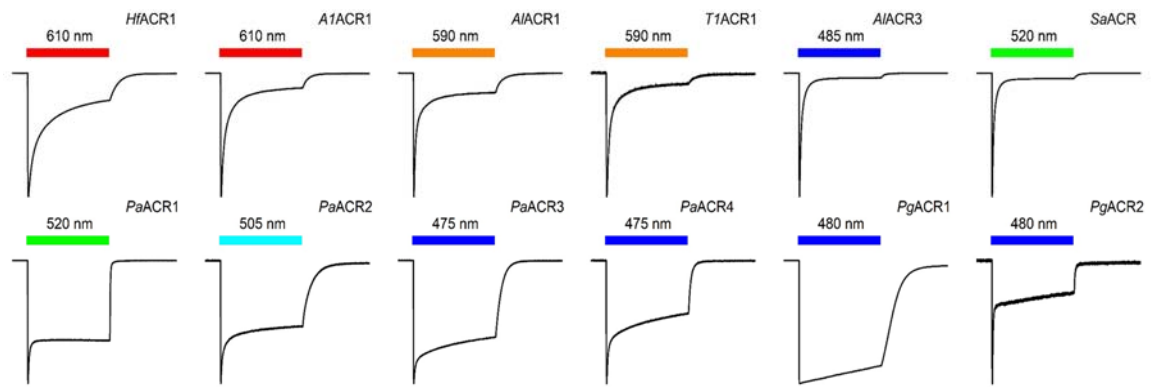

**Fig. S3.** Photocurrent traces recorded in response to the first 1-s light pulse at -60 mV at the amplifier output, normalized at their peak value. The duration of illumination is showed as a colored bar on top.

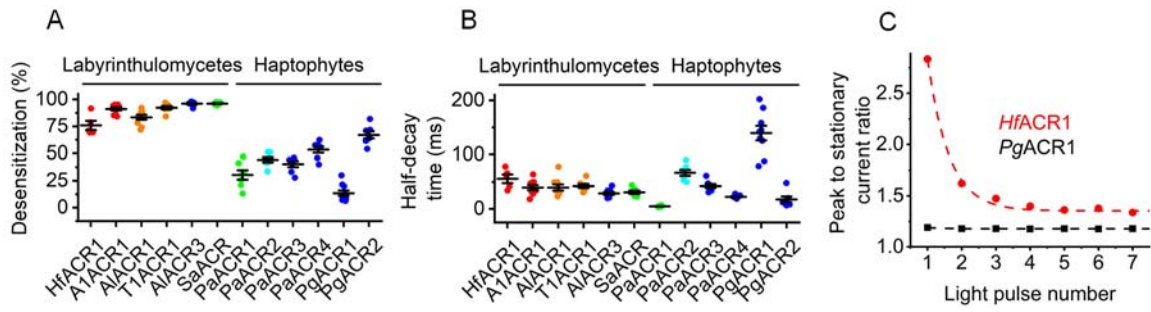

**Fig. S4.** (A and B) The magnitude of desensitization during continuous illumination (A) and half-decay of photocurrent after switching the light off (B). The black lines show the mean values and s.e.m. ( $n = 5-10$  cells for each variant); colored circles, the individual data points. (C) The ratio of the peak amplitude to that of the stationary current (measured at the end of a 1-s light pulse) in a series of pulses applied with 30-s time interval. The lines are single exponential fits.

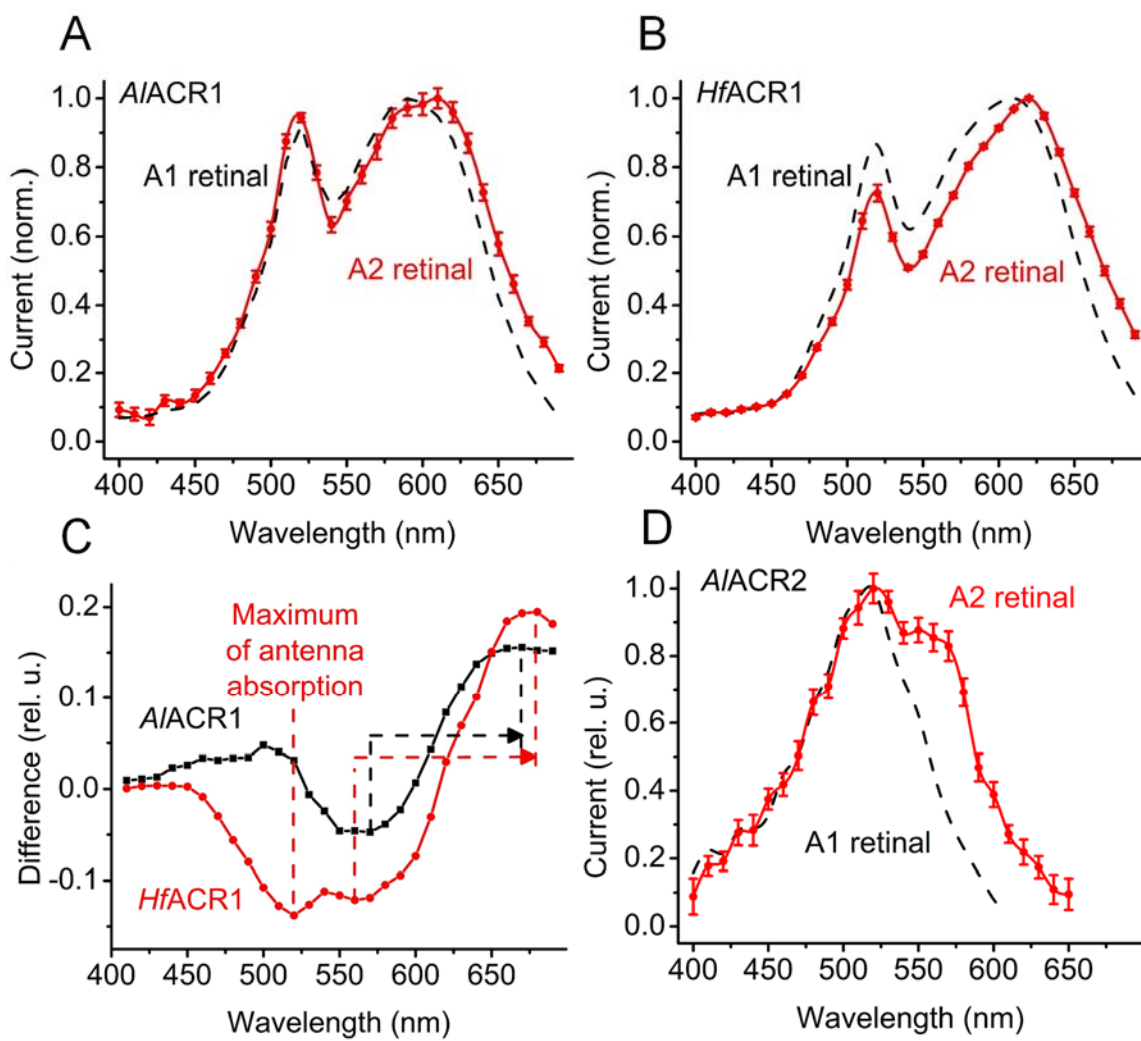

**Fig. S5.** (A, B and D) The action spectra of photocurrents generated by indicated proteins reconstituted with A1 (black) and A2 (red) retinal. (C) The difference spectra (A2-A1 retinal).



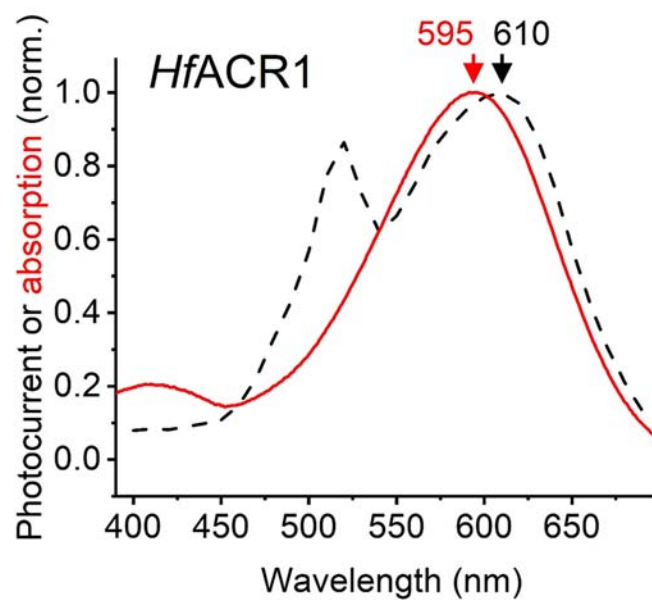

**Fig. S6.** The absorption spectrum of *HfACR1* detergent-purified from *Pichia* (red solid line) compared to the action spectrum of photocurrents generated upon its expression in HEK293 cells from Fig. 1B (black dashed line).

**Table S1.** A list of Laby ACR homologs (in bold – synthesized and tested by patch clamp in this study)

|     | GenBank accession number      | Abbreviated protein name | Source organism                                    | JGI gene model name                     | Total CDS length            | $\lambda_{\max}$ (nm) |
|-----|-------------------------------|--------------------------|----------------------------------------------------|-----------------------------------------|-----------------------------|-----------------------|
| 1.  | QDJC01000532                  | <i>Aa</i> ACR1           | <i>Aurantiochytrium acetophilum</i> HS399          | identical to <i>A</i> /ACR1             | 691                         |                       |
| 2.  | QDJC01003161                  | <i>Aa</i> ACR2           |                                                    | identical to <i>A</i> /ACR2             | 635                         |                       |
| 3.  | QDJC01000037                  | <i>Aa</i> ACR3           |                                                    | only two mismatches with <i>A</i> /ACR3 | 683                         |                       |
| 4.  | <b>MT002467</b>               | <b><i>A</i>/ACR1</b>     | <i>Aurantiochytrium limacinum</i> ATCC MYA-1381    | <b>fgenesh1_pg.12_#_284</b>             | <b>696</b>                  | <b>590</b>            |
| 5.  | <b>MT002473</b>               | <b><i>A</i>/ACR2</b>     |                                                    | <b>gm1.7690_g</b>                       | <b>635</b>                  | <b>545</b>            |
| 6.  | <b>MT002476</b>               | <b><i>A</i>/ACR3</b>     |                                                    | <b>estExt_Genemark1.C_1_t20010</b>      | <b>678</b>                  | <b>485</b>            |
| 7.  | <b>MT002468, BGKB01000037</b> | <b><i>A</i>1ACR1</b>     | <i>Aurantiochytrium</i> sp. KH105                  |                                         | <b>646</b>                  | <b>610</b>            |
| 8.  | BGKB01000105                  | <i>A</i> 1ACR1           |                                                    |                                         | 645                         |                       |
| 9.  | BGKB01000099                  | <i>A</i> 1ACR3           |                                                    |                                         | 680                         |                       |
| 10. | BGKB01000102                  | <i>A</i> 1ACR3           |                                                    |                                         | 680                         |                       |
| 11. | LNGJ01004228                  | <i>A</i> 2ACR1           |                                                    | <i>Aurantiochytrium</i> sp. T66         | identical to <i>T</i> 1ACR1 | 649                   |
| 12. | LNGJ01002066                  | <i>A</i> 2ACR3           |                                                    |                                         | 759                         |                       |
| 13. | <b>MT002469, GBG24568</b>     | <b><i>Hf</i>ACR1</b>     | <i>Hondaea fermentalgiana</i> FCC1311              |                                         | <b>646</b>                  | <b>610</b>            |
| 14. | GBG24569                      | <i>Hf</i> ACR2           |                                                    |                                         | 663                         |                       |
| 15. | GBG23965                      | <i>Hf</i> ACR3           |                                                    |                                         | 680                         |                       |
| 16. | <b>MT002463</b>               | <b><i>Sa</i>ACR</b>      | <b><i>Schizochytrium aggregatum</i> ATCC 28209</b> | <b>fgenesh1_pg.3_#_476</b>              | <b>546</b>                  | <b>520</b>            |
| 17. | JTFK01000019                  | <i>S</i> 1ACR1           | <i>Schizochytrium</i> sp. CCTCC M209059            |                                         | 645                         |                       |
| 18. | JTFK01000324                  | <i>S</i> 1ACR3           |                                                    |                                         | 680                         |                       |
| 19. | SMSO01000032                  | <i>S</i> 2ACR1           | <i>Schizochytrium</i> sp. TIO01                    | Identical to <i>A</i> /ACR1             | 696                         |                       |
| 20. | SMSO01000014                  | <i>S</i> 2ACR3           |                                                    |                                         | 583                         |                       |
| 21. | <b>MT002470, MUFY01006470</b> | <b><i>T</i>1ACR1</b>     | <b><i>Thraustochytrium</i> sp. ATCC 26185</b>      |                                         | <b>649</b>                  | <b>590</b>            |
| 22. | MUFY01006469                  | <i>T</i> 1ACR2           |                                                    |                                         | 666                         |                       |
| 23. | MUFY01009420                  | <i>T</i> 1ACR3           |                                                    |                                         | 682                         |                       |

**Table S2.** A list of Hapto ACR homologs tested in this study

|    | GenBank accession number | Abbreviated protein name | Source organism                        | JGI gene model name                                           | Total CDS length | $\lambda_{\max}$ (nm) |
|----|--------------------------|--------------------------|----------------------------------------|---------------------------------------------------------------|------------------|-----------------------|
| 1. | MT002471                 | <i>Pa</i> ACR1           | <i>Phaeocystis antarctica</i> CCMP1374 | Phant.0066s0015.1                                             | 1682             | 520                   |
| 2. | MT002474                 | <i>Pa</i> ACR2           |                                        | Phant.0011s0329.1                                             | 647              | 505                   |
| 3. | MT002477                 | <i>Pa</i> ACR3           |                                        | Phant.0016s0461.1,<br>Phant.0016s0462.1,<br>Phant.0016s0464.1 | 427              | 475                   |
| 4. | MT002464                 | <i>Pa</i> ACR4           |                                        | Phant.0060s0074.1                                             | 469              | 475                   |
| 5. | MT002465                 | <i>Pa</i> ACR5           |                                        | Phant.0086s0086.1                                             | 312              | N.A.                  |
| 6. | MT002466                 | <i>Pa</i> ACR6           |                                        | Phant.0001s0932.1                                             | 471              | N.A.                  |
| 7. | MT002472                 | <i>Pg</i> ACR1           | <i>Phaeocystis globosa</i> Pg-G        | Phglo.0395s0005.1                                             | 327              | 480                   |
| 8. | MT002475                 | <i>Pg</i> ACR2           |                                        | Phglo.0149s0014.1                                             | 435              | 480                   |
| 9. | MT002478                 | <i>Pg</i> ACR3           |                                        | Phglo.0128s0040.1                                             | 505              | N.A.                  |
